# Supplementary material for: Protein kinase Ds promote tumor angiogenesis through mast cell recruitment and expression of angiogenic factors in prostate cancer microenvironment
Source: PubMed Central journal article supplement (PMC6404326; doi:10.1186/s13046-019-1118-y), 2019-03-06

# Fig. S7

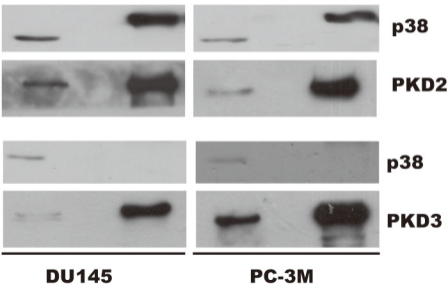

Supplement: 13046_2019_1118_MOESM9_ESM.pdf [file 13046_2019_1118_MOESM9_ESM.pdf]
